# Supplementary material for: Determining Clostridium difficile intra-taxa diversity by mining multilocus sequence typing databases
Source: PubMed Central journal article supplement (PMC5348806; doi:10.1186/s12866-017-0969-7), 2017-03-14
Supplement: 12866_2017_969_MOESM6_ESM.pdf [file 12866_2017_969_MOESM6_ESM.pdf]

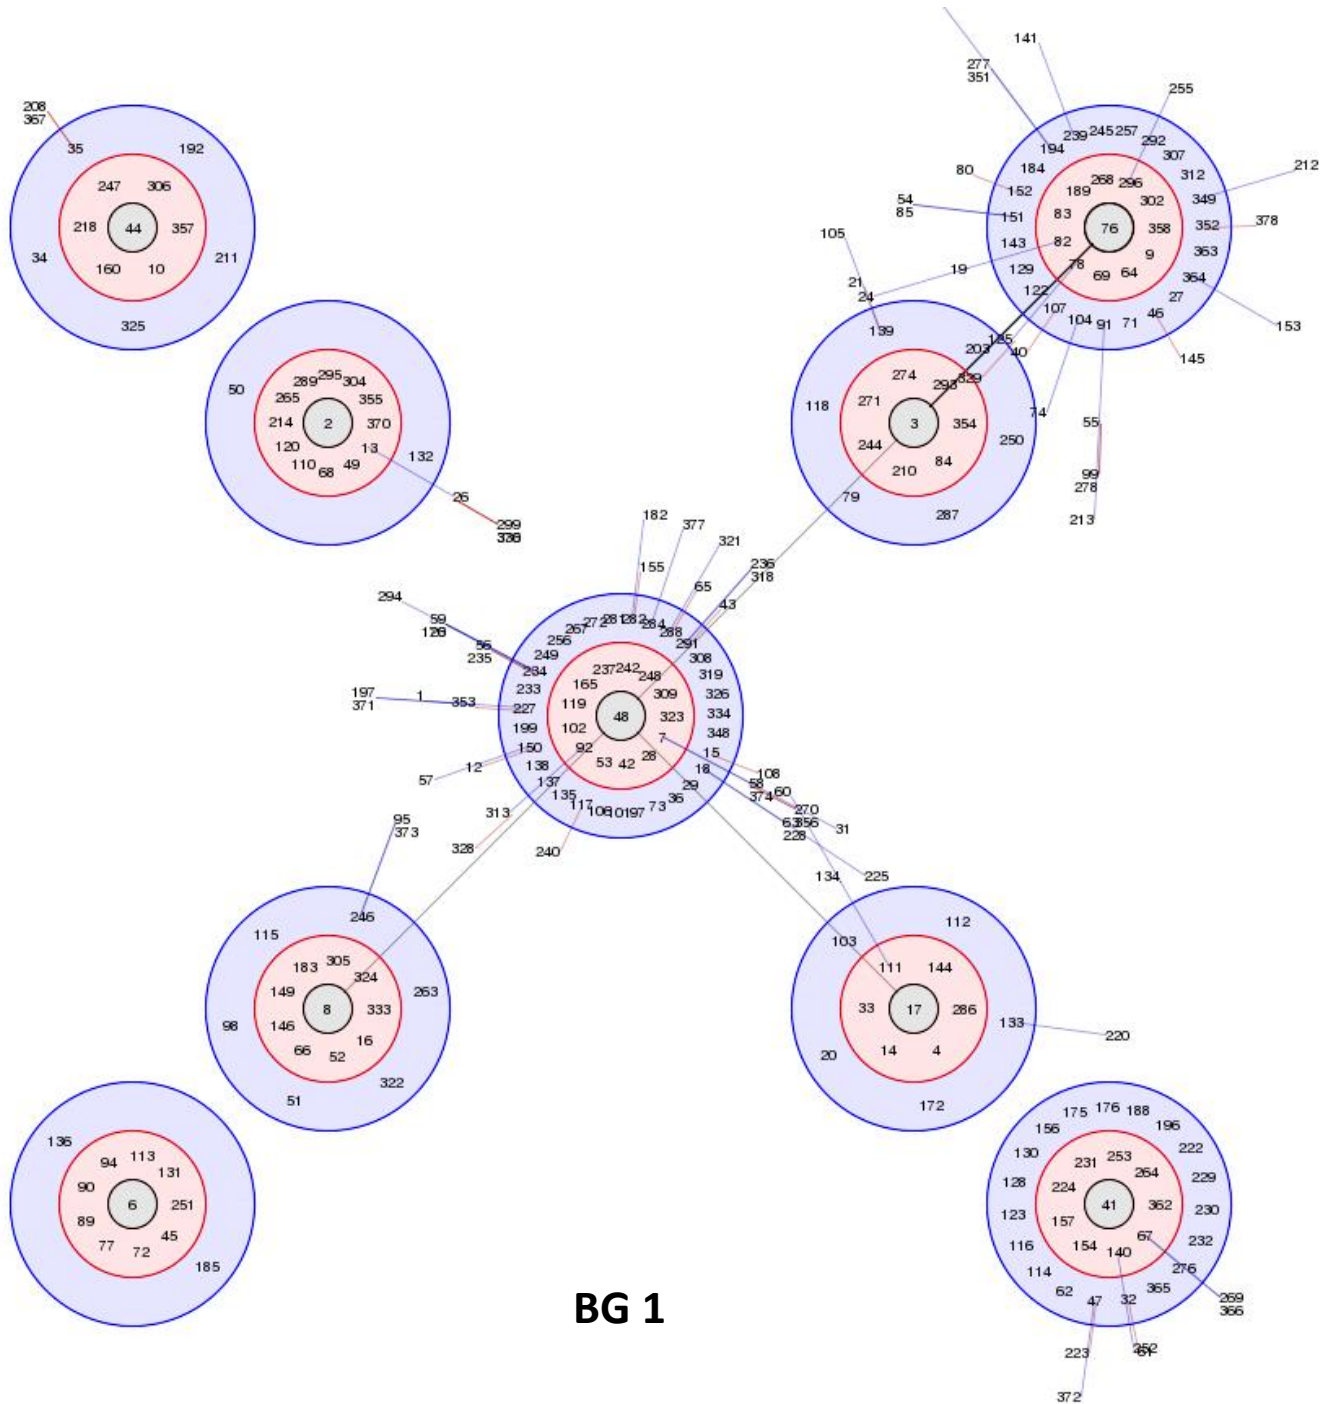

BG 1

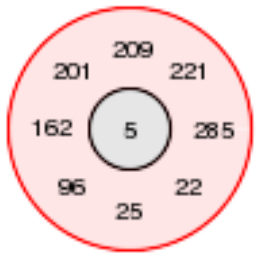

**BG 2**

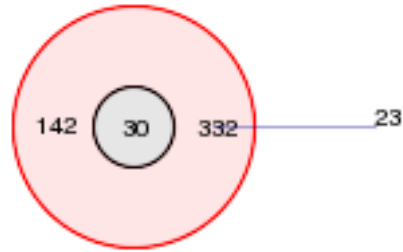

**BG 4**

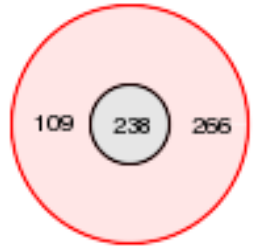

**Group 6**

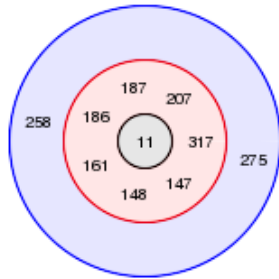

**BG 3**

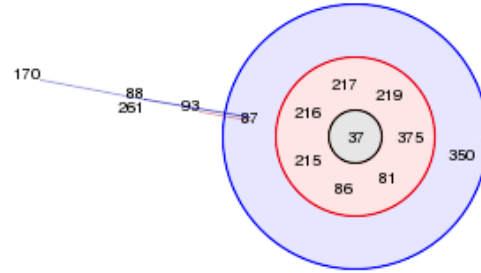

**BG 5**

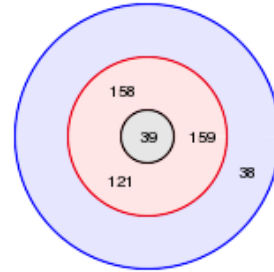

**BG 11**

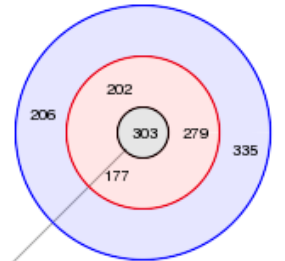

**BG 8**

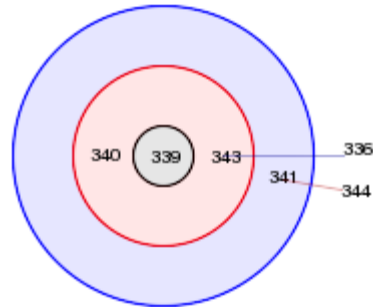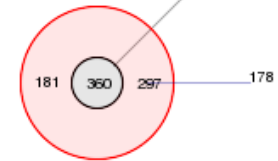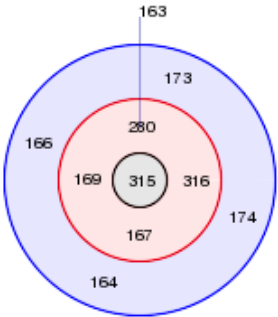

### BG 7

| ST  | Frequency | SLV | DLV | SAT |
|-----|-----------|-----|-----|-----|
| 124 | 1         | 3   | 4   | 5   |
| 127 | 1         | 2   | 4   | 6   |
| 241 | 1         | 4   | 4   | 4   |
| 243 | 1         | 4   | 4   | 4   |
| 254 | 1         | 3   | 7   | 2   |
| 259 | 1         | 1   | 3   | 8   |
| 262 | 1         | 1   | 4   | 7   |
| 273 | 1         | 1   | 2   | 9   |
| 283 | 1         | 1   | 1   | 10  |
| 298 | 1         | 3   | 5   | 4   |
| 310 | 1         | 1   | 3   | 8   |
| 320 | 1         | 2   | 4   | 6   |
| 327 | 1         | 0   | 3   | 9   |

### BG 9

| ST  | Frequency | SLV | DLV | SAT |
|-----|-----------|-----|-----|-----|
| 200 | 1         | 1   | 0   |     |
| 368 | 1         | 1   | 0   |     |

### BG 10

| ST  | Frequency | SLV | DLV | SAT |
|-----|-----------|-----|-----|-----|
| 260 | 1         | 0   | 1   |     |
| 300 | 1         | 0   | 1   |     |

### BG 12

| ST  | Frequency | SLV | DLV | SAT |
|-----|-----------|-----|-----|-----|
| 337 | 1         | 1   | 0   |     |
| 338 | 1         | 1   | 0   |     |

### BG 13

| ST  | Frequency | SLV | DLV | SAT |
|-----|-----------|-----|-----|-----|
| 346 | 1         | 0   | 1   |     |
| 369 | 1         | 0   | 1   |     |

| ST  | Frequency |
|-----|-----------|
| 75  | 1         |
| 100 | 1         |
| 168 | 1         |
| 171 | 1         |
| 179 | 1         |
| 180 | 1         |
| 190 | 1         |
| 191 | 1         |
| 193 | 1         |
| 195 | 1         |
| 198 | 1         |
| 204 | 1         |
| 205 | 1         |
| 290 | 1         |
| 311 | 1         |
| 314 | 1         |
| 331 | 1         |
| 342 | 1         |
| 345 | 1         |
| 347 | 1         |
| 359 | 1         |
| 361 | 1         |
| 379 | 1         |
| 380 | 1         |

**24 singltons**
