# Supplementary material for: Determining Clostridium difficile intra-taxa diversity by mining multilocus sequence typing databases
Source: PubMed Central journal article supplement (PMC5348806; doi:10.1186/s12866-017-0969-7), 2017-03-14

*adk*

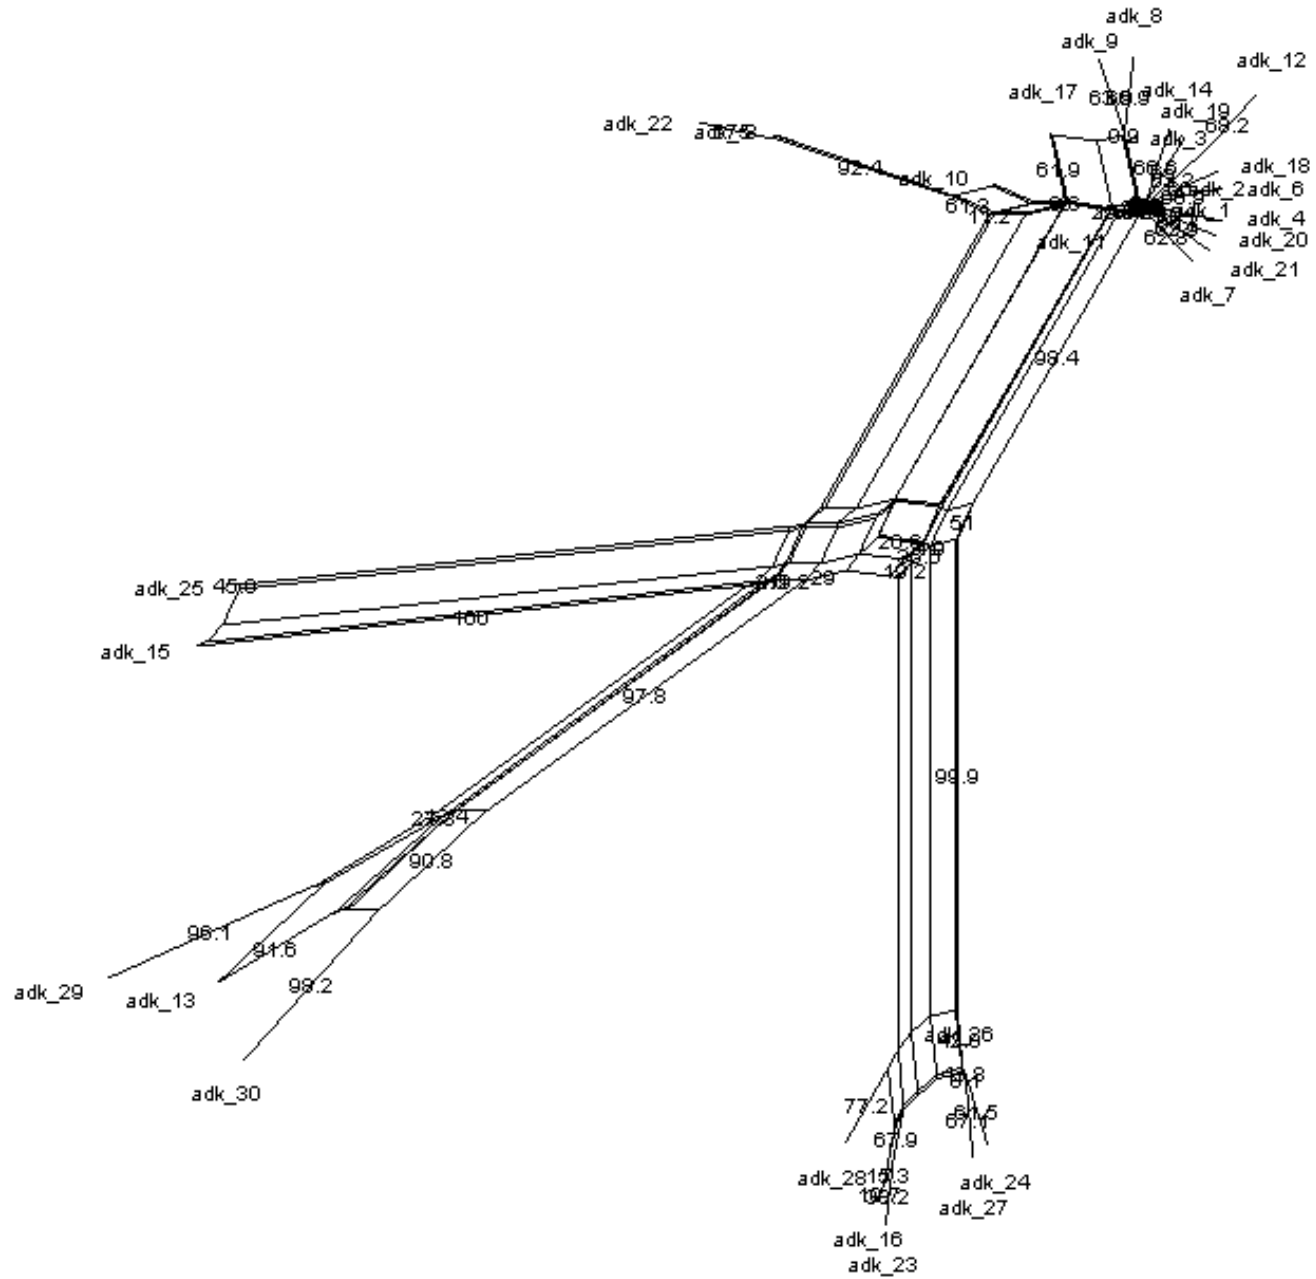

# *atpA*

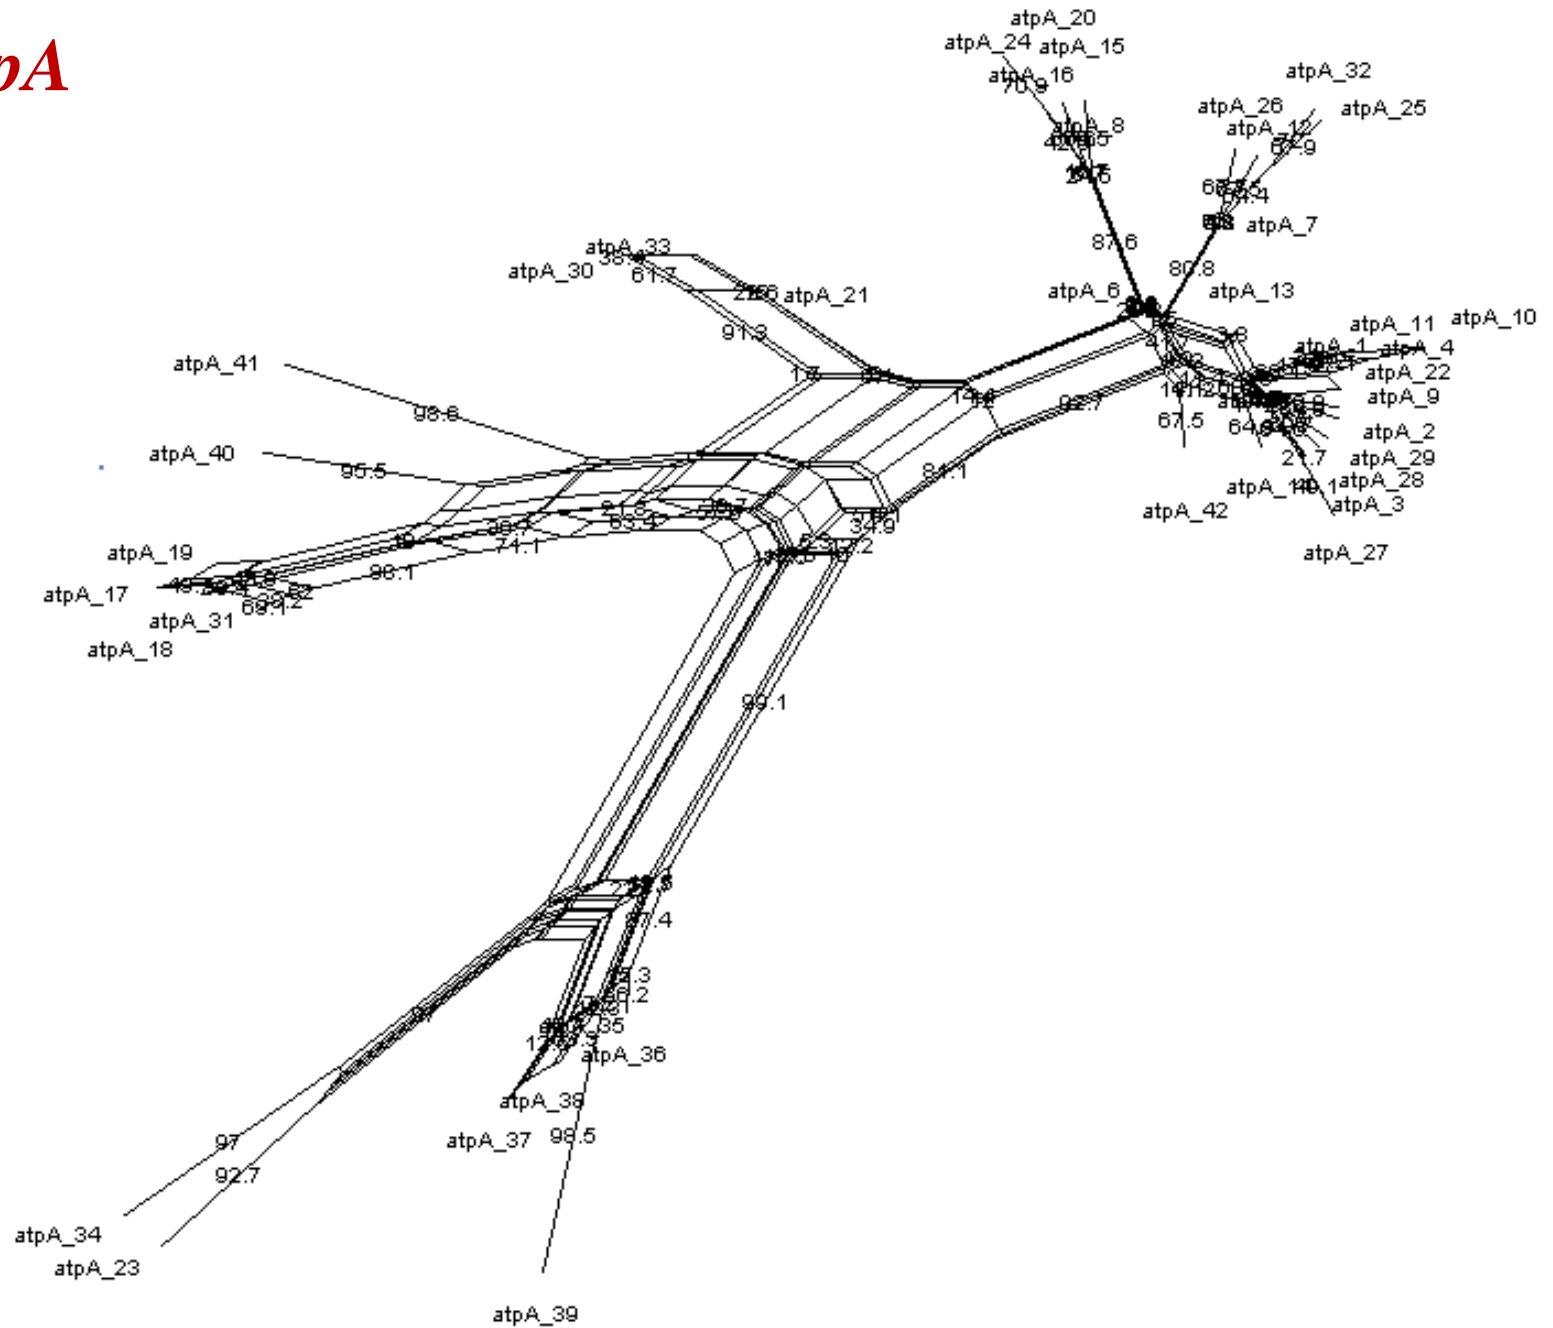

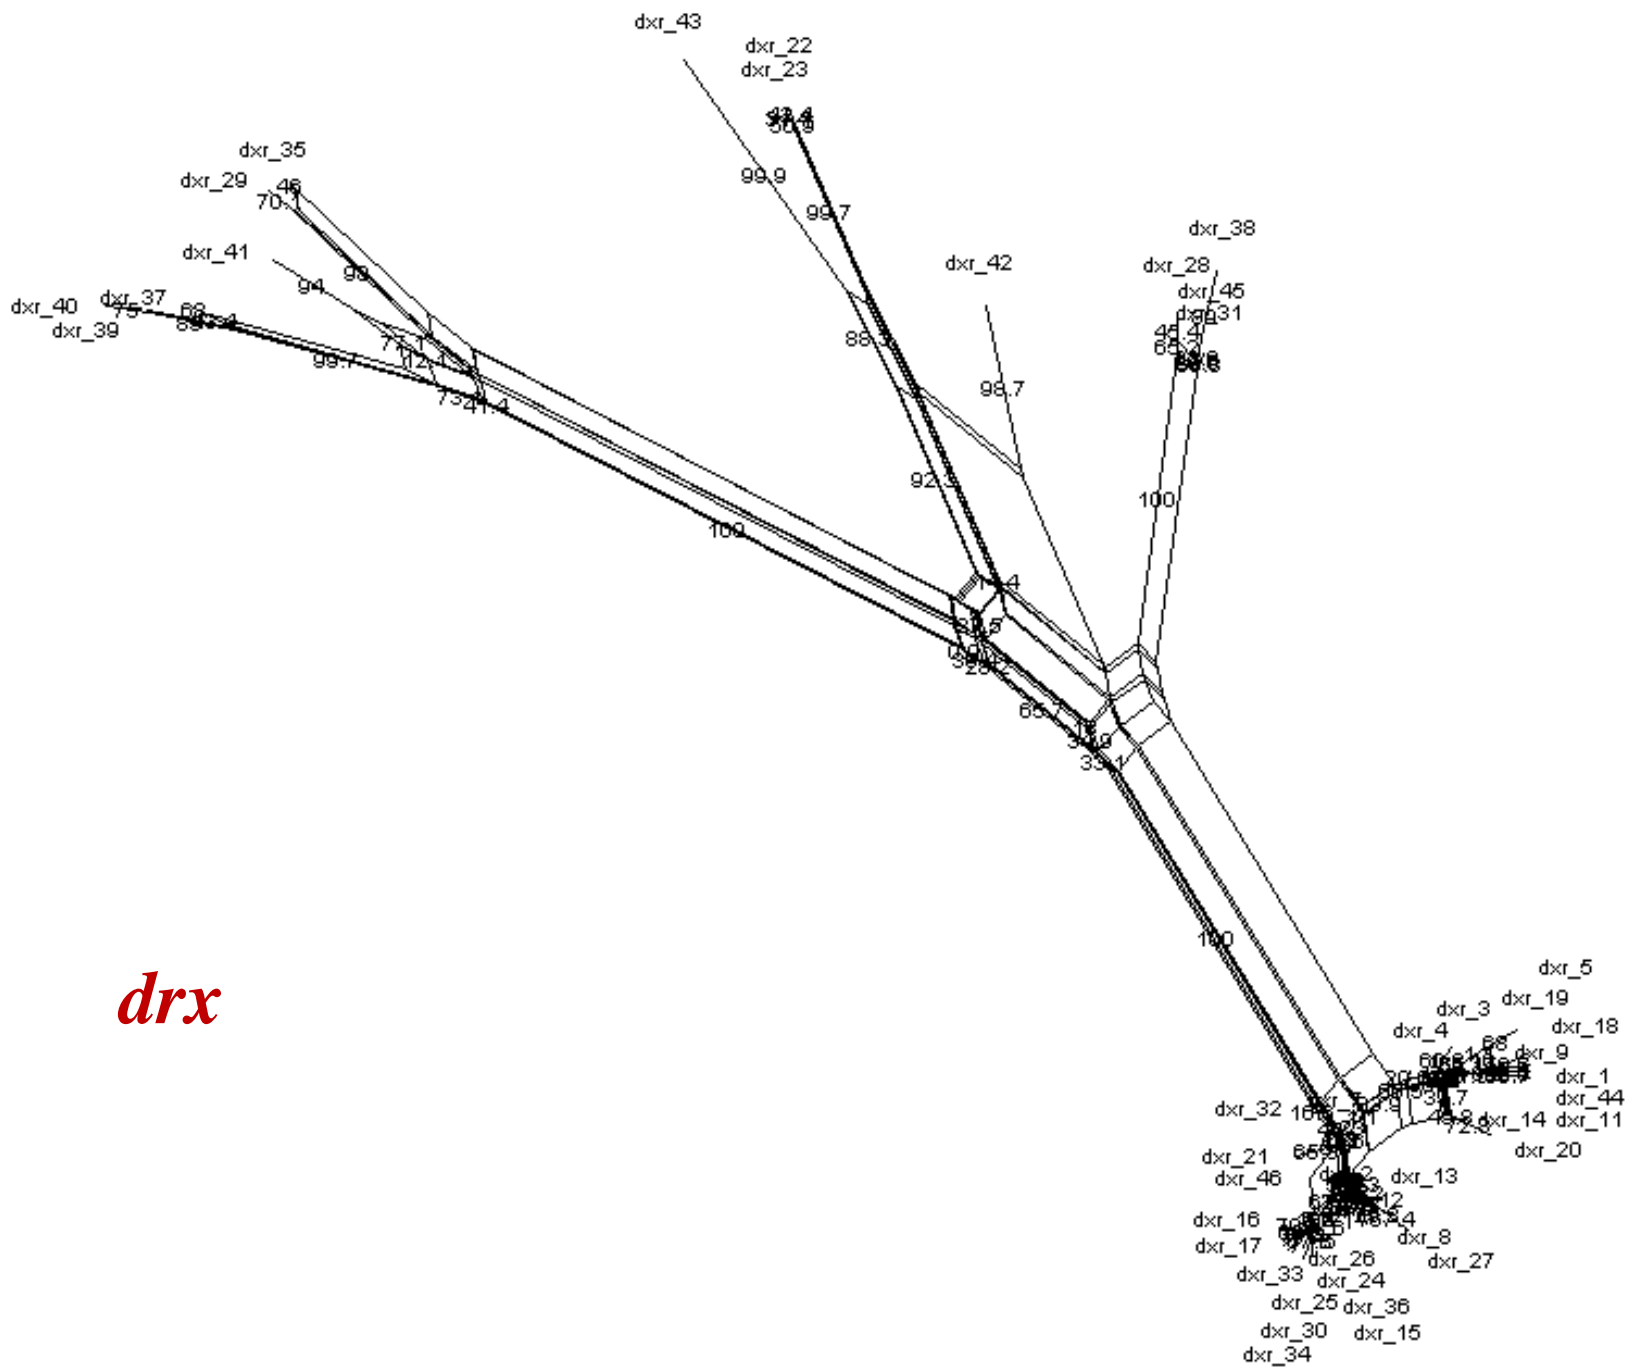

*drx*

# glyA

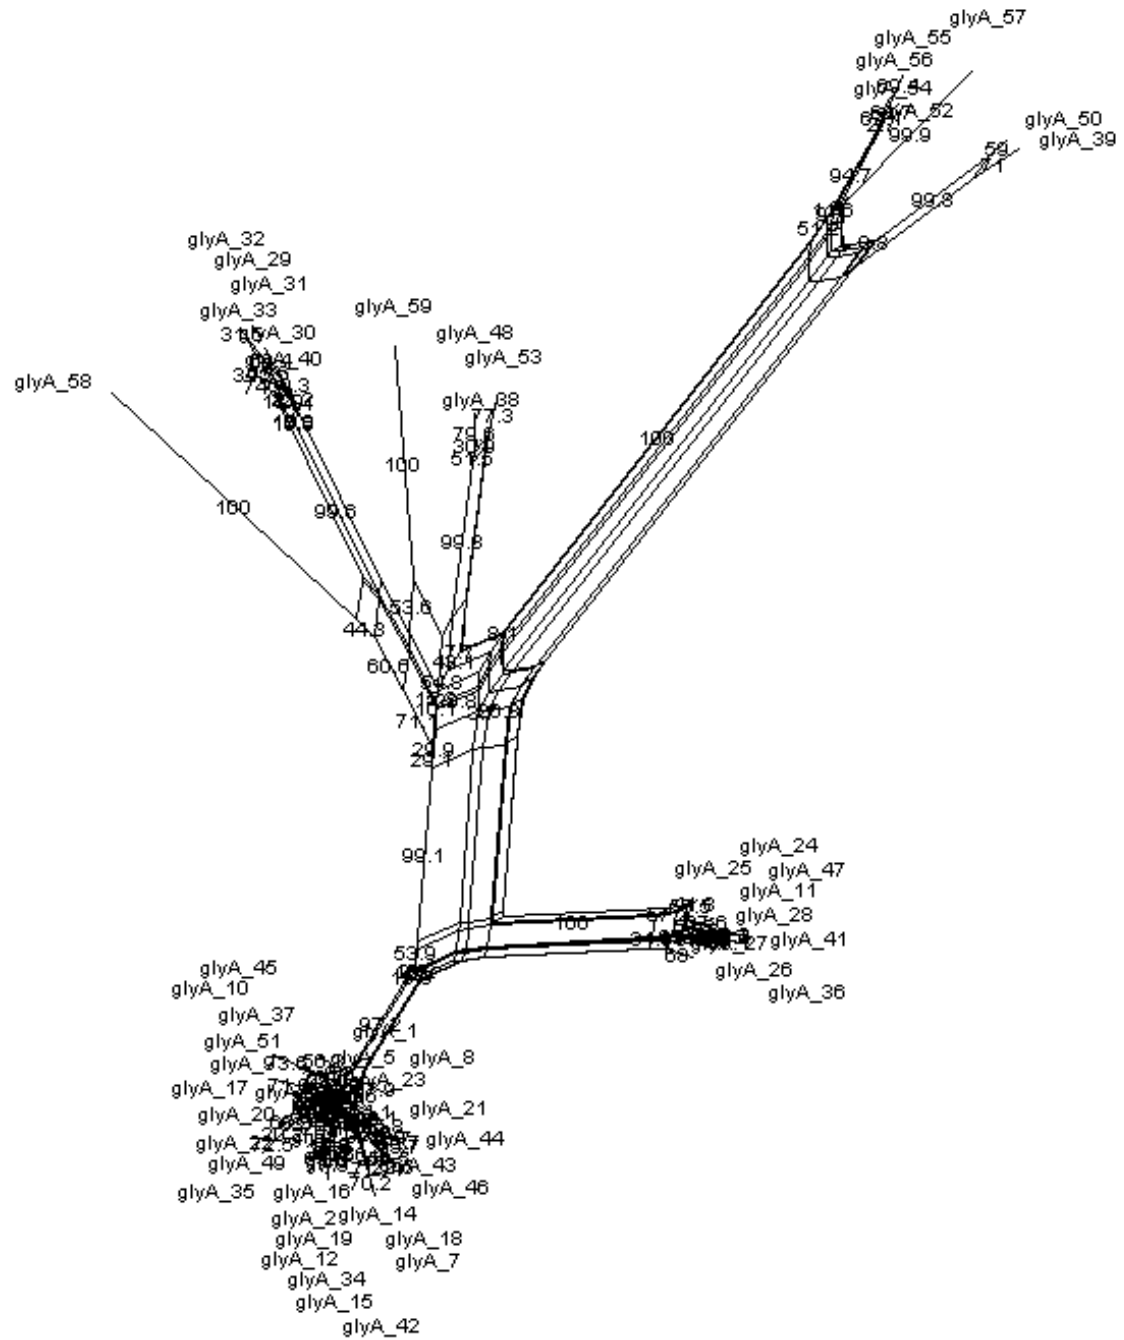

# recA

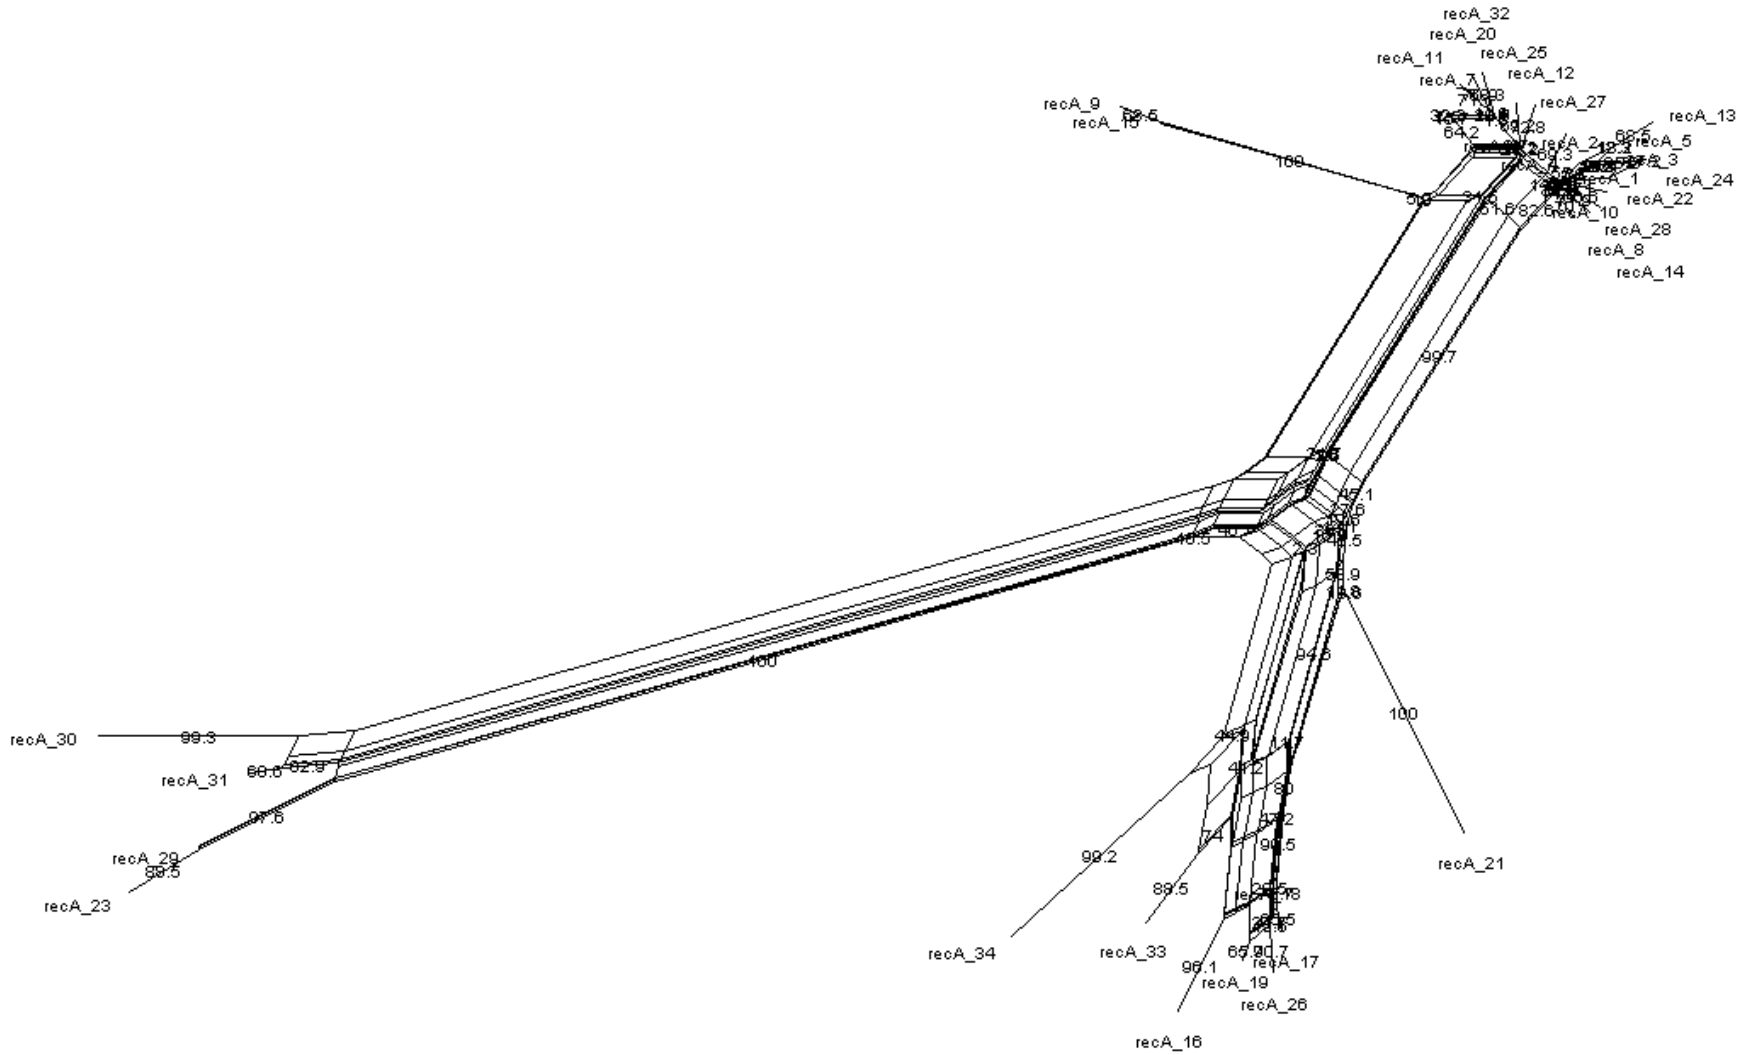

sodA\_21

100

sodA\_14  
sodA\_40  
sodA\_23  
sodA\_15  
sodA\_3  
sodA\_54  
sodA\_6  
sodA\_10 sodA\_28  
sodA\_13 sodA\_33  
sodA\_27 sodA\_51  
sodA\_43 sodA\_17  
sodA\_19 sodA\_7  
sodA\_35 sodA\_12  
sodA\_24  
sodA\_1  
sodA\_18  
sodA\_25 sodA\_44  
sodA\_30 sodA\_16  
sodA\_45  
sodA\_20  
sodA\_8  
sodA\_29 sodA\_39  
sodA\_11  
sodA\_9  
sodA\_28  
sodA\_34

sodA\_53

100

sodA\_52

98.4

sodA\_34

98.7

sodA\_32

98.7

sodA\_38

100

sodA\_36

77.2

sodA\_46

100

sodA\_48

sodA\_49

99.7

sodA\_47

99.6

sodA\_47

100

sodA\_37

99.6

sodA\_50

*sodA*

*tpi*

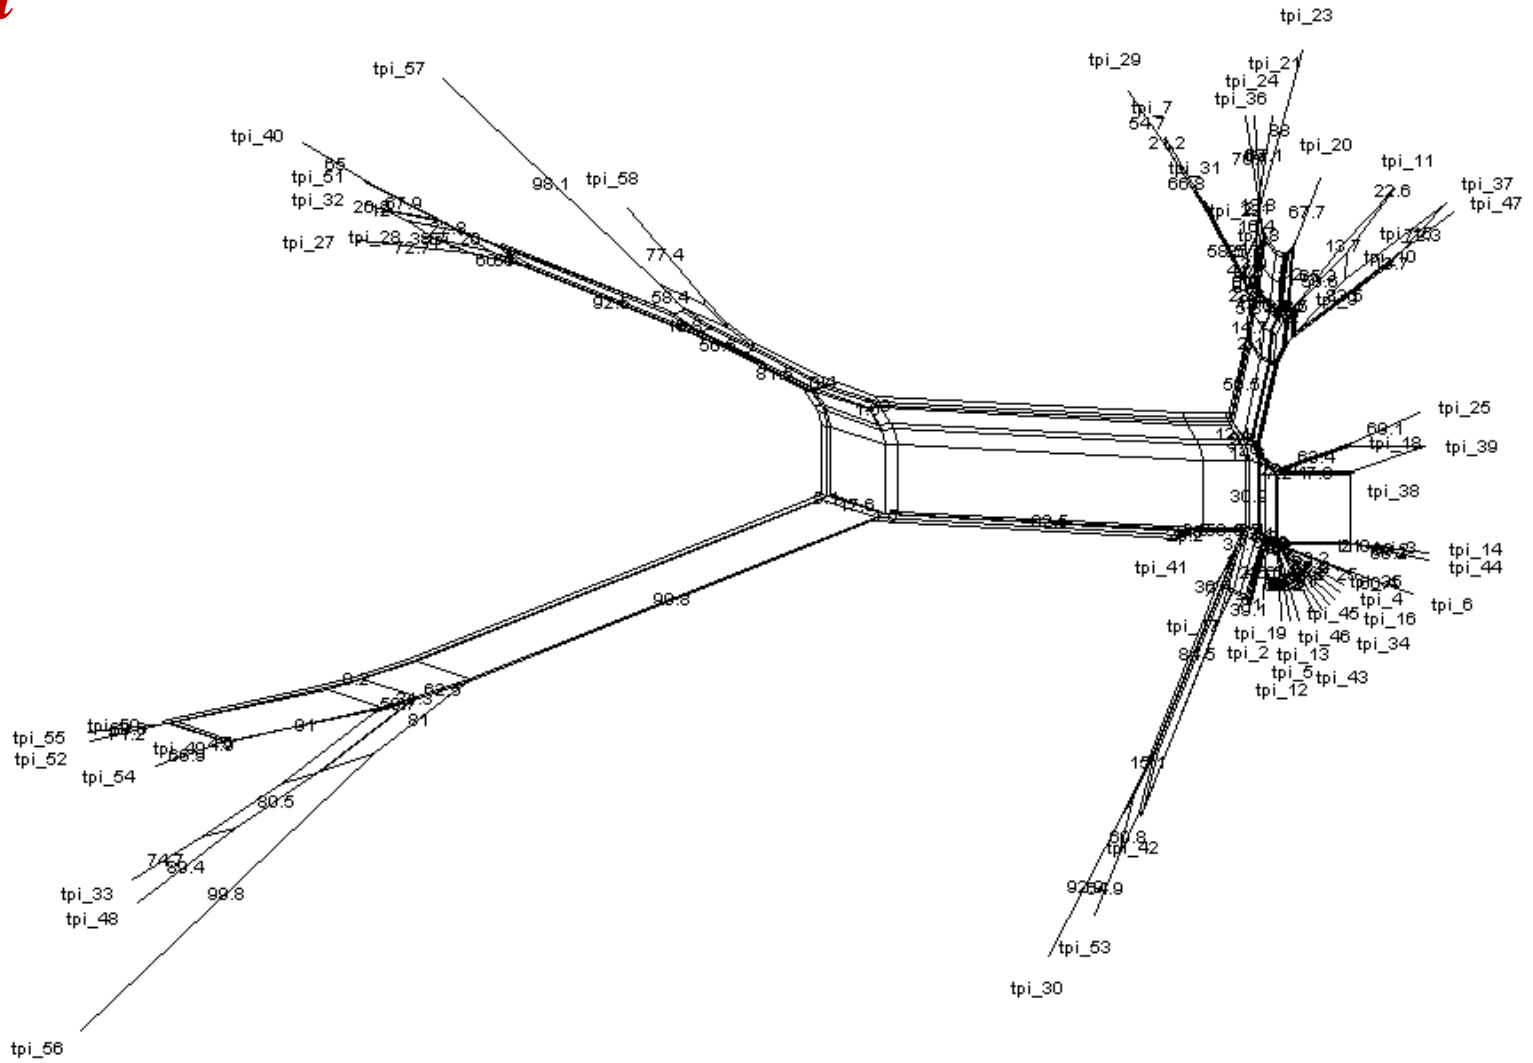

Supplement: 12866_2017_969_MOESM8_ESM.pdf [file 12866_2017_969_MOESM8_ESM.pdf]
