# Supplementary material for: Determining Clostridium difficile intra-taxa diversity by mining multilocus sequence typing databases
Source: PubMed Central journal article supplement (PMC5348806; doi:10.1186/s12866-017-0969-7), 2017-03-14
Supplement: 12866_2017_969_MOESM9_ESM.pdf [file 12866_2017_969_MOESM9_ESM.pdf]

adk

ST377-AR-NV  
ST378-IT-C1  
ST376-AR-C1  
ST374-CN-C1  
ST373-CN-C2  
ST372-CN-C2  
ST371-CN-C2  
ST370-CA-C1  
ST366-US-C2  
ST365-US-C2  
ST364-US-C2  
ST363-US-C1  
ST362-CN-C2  
ST358-CN-C1  
ST99-UK-C1  
ST98-UK-C1  
ST97-UK-C2  
ST96-UK-C3  
ST95-UK-C2  
ST92-UK-C1  
ST91-UK-C1  
ST9-UK-C1  
ST85-US-C1  
ST84-US-C1  
ST83-US-C1  
ST82-US-C1  
ST80-US-C1  
ST8-UK-US-C1  
ST79-US-C1  
ST76-UK-C1  
ST74-UK-C1  
ST73-UK-C1  
ST70-UK-C1  
ST7-UK-C1  
ST69-UK-C1  
ST68-UK-C1  
ST67-UK-C2  
ST66-UK-C1  
ST65-UK-C1  
ST64-UK-C1  
ST63-UK-US-C1  
ST62-UK-C2  
ST61-UK-C2  
ST60-UK-C1  
ST59-UK-C1  
ST58-UK-C1  
ST57-UK-C1  
ST56-UK-C1  
ST55-UK-C1  
ST54-UK-C1  
ST53-UK-C1  
ST52-UK-C1  
ST51-UK-C1  
ST50-UK-C1  
ST5-UK-C3  
ST49-UK-C1  
ST48-UK-C1  
ST47-UK-C2  
ST43-UK-C1  
ST42-UK-US-C1  
ST41-UK-C2  
ST4-UK-C1  
ST355-GE-C1  
ST354-GE-C1  
ST353-GE-C2  
ST352-CN-C1  
ST351-JA-C2  
ST349-CN-C1  
ST348-CN-C1  
ST34-UK-C1  
ST334-CN-C1  
ST333-CN-C1  
ST330-JA-C1  
ST33-UK-C1  
ST328-UK-C1  
ST327-UK-C4  
ST326-JA-C1  
ST324-UK-C1  
ST323-UK-C1  
ST322-UK-C1  
ST321-CN-C1  
ST32-UK-C2  
ST319-CN-C1  
ST318-CN-C1  
ST313-UK-C1  
ST312-UK-C1  
ST31-UK-US-C1  
ST309-UK-C1  
ST308-UK-C1  
ST304-JA-NV  
ST302-JA-C1  
ST301-JA-C1  
ST3-UK-US-C1  
ST299-JA-C1  
ST296-JA-C1  
ST295-UK-C1  
ST294-CN-C1  
ST293-CN-C1  
ST292-CN-C1  
ST291-CA-C1  
ST29-US-C1  
ST289-CN-C1  
ST288-CN-C1  
ST286-CN-C1  
ST285-CN-C3  
ST284-UK-NV  
ST282-UK-NV  
ST281-UK-NV  
ST28-UK-US-C1  
ST277-CL-C2  
ST276-CL-C2  
ST274-CN-NV  
ST272-UK-C1  
ST271-UK-C1  
ST270-UK-C1  
ST27-UK-C1  
ST268-UK-C1  
ST267-UK-C1  
ST265-UK-C1  
ST264-UK-C2  
ST263-UK-C1  
ST26-UK-US-C1  
ST257-UK-C1  
ST256-UK-C1  
ST253-UK-C2  
ST252-UK-C2  
ST250-UK-C1  
ST249-UK-C1  
ST248-UK-C1  
ST246-UK-C1  
ST245-UK-C1  
ST244-UK-C1  
ST242-UK-C1  
ST240-UK-C1  
ST24-UK-C1  
ST239-UK-C1  
ST237-UK-C1  
ST236-UK-C1  
ST235-UK-C1  
38 ST234-UK-C1  
ST233-UK-C1  
ST232-UK-C2  
ST231-UK-C2  
ST230-UK-C2  
ST229-UK-C2  
ST228-UK-C2  
ST227-UK-C2  
ST226-UK-C2  
ST225-UK-C1  
ST224-UK-C2  
ST223-UK-C2  
ST222-UK-C2  
ST221-CN-C3  
ST220-CN-C3  
ST22-UK-C3  
ST214-CN-C1  
ST213-CN-C1  
ST212-CN-C1  
ST210-CN-NV  
ST209-CN-C3  
ST205-JA-C1  
ST203-JA-C1  
ST201-JA-C3  
ST20-UK-C1  
ST2-UK-US-C1  
ST199-SL-C1  
ST197-SL-C2  
ST196-SL-C2  
ST194-SL-C2  
ST192-SL-C2  
ST191-US-C1  
ST19-UK-C1  
ST189-US-C1  
ST188-US-C2  
ST184-JA-C1  
ST183-JA-C1  
ST18-UK-C1  
ST176-US-C2  
ST175-AU-C2  
ST172-CN-C1  
ST171-UK-C1  
ST17-UK-C1  
ST165-UK-C1  
ST162-UK-C3  
ST16-UK-C1  
ST157-UK-C2  
ST156-UK-C2  
ST154-UK-C2  
ST153-UK-C1  
ST152-UK-C1  
ST151-UK-C1  
ST150-UK-C1  
ST15-UK-US-C1  
ST149-UK-C1  
ST146-UK-C1  
ST144-UK-C1  
ST143-UK-C1  
ST141-UK-C1  
ST14-UK-C1  
ST137-UK-C1  
ST135-UK-C1  
ST134-UK-C1  
ST133-UK-C1  
ST130-SP-C2  
ST13-UK-C1  
ST129-CN-C1  
ST128-NE-C1  
ST126-NE-C1  
ST123-NE-C2  
ST122-NE-NV  
ST120-NE-C2  
ST12-UK-C1  
ST119-CN-C1  
ST118-CN-C1  
ST117-CN-C1  
ST116-NE-C2  
ST115-NE-C1  
ST114-UK-C2  
ST112-UK-C1  
ST111-UK-C1  
ST110-US-C1  
ST108-US-C1  
ST104-DE-C1  
ST103-DE-C1  
ST102-DE-C1  
ST101-US-C1  
ST100-US-C1  
ST1-UK-C2  
ST190-US-C1  
ST269-UK-C2  
ST305-UK-C1  
ST307-UK-C1  
72 ST379-IT-C1  
ST25-UK-C3  
ST300-JA-C4  
ST155-UK-C1  
ST10-UK-US-C1  
ST105-DE-C1  
ST106-DE-C1  
ST113-UK-C1  
ST131-UK-C1  
ST136-UK-C1  
ST138-UK-C1  
ST139-UK-C1  
ST160-UK-C1  
ST182-JA-C1  
ST185-JA-C1  
ST208-CN-C1  
ST21-UK-C1  
ST211-CN-NV  
ST218-CN-C1  
ST247-UK-C1  
63 ST251-UK-C1  
ST255-UK-C1  
ST278-CN-C1  
ST287-CN-C1  
ST306-UK-C1  
ST325-UK-C1  
ST35-UK-C1  
ST44-UK-C1  
ST6-UK-US-C1  
ST72-UK-C1  
ST77-UK-C1  
ST89-UK-C1  
ST90-UK-C1  
ST94-UK-C1  
ST357-CN-C1  
ST367-US-C1  
ST107-UK-C1  
ST125-UK-C1  
ST145-UK-C1  
ST329-UK-C1  
ST40-UK-C1  
6 ST45-UK-C1  
ST46-UK-C1  
ST71-UK-C1  
ST78-UK-C1  
ST75-UK-C1  
ST124-UK-C4  
ST127-NE-C4  
ST198-UK-C4  
ST241-UK-C4  
ST243-UK-C4  
ST254-UK-C4  
ST259-UK-C4  
ST262-UK-C4  
ST273-UK-C4  
ST283-UK-NV  
ST298-JA-C4  
43 ST310-UK-C4  
ST320-CN-C4  
ST260-UK-C4  
6 ST142-UK-C4  
6 ST30-UK-C4  
6 ST170-AU-C4  
ST88-UK-C4  
ST109-US-C4  
ST121-NE-C4  
30 ST158-UK-C4  
ST159-UK-C4  
ST215-CN-C4  
ST216-CN-C4  
ST217-CN-C4  
ST219-CN-C4  
ST23-UK-C4  
35 ST238-UK-C4  
ST261-UK-C4  
ST266-UK-C4  
ST332-CN-C4  
ST350-JA-C4  
ST37-UK-C4  
ST38-UK-C4  
ST39-UK-C4  
ST81-US-C4  
ST86-US-C4  
ST87-US-C4  
ST93-US-C4  
ST375-AR-C4  
ST168-AU-C5  
ST380-IT-C1  
ST147-UK-C5  
ST317-UK-C5  
ST11-UK-C5  
ST132-UK-C1  
32 ST148-UK-C5  
ST161-UK-C5  
58 ST163-AU-C5  
ST164-AU-C5  
ST166-AU-C5  
ST167-AU-C5  
ST169-AU-C5  
ST173-AU-C5  
94 ST174-AU-C5  
ST186-UK-C5  
ST187-UK-C5  
ST193-SL-C5  
ST195-SL-C5  
ST207-UK-C5  
ST258-UK-C5  
ST275-CL-C5  
ST280-AU-C5  
ST315-AU-C5  
ST316-AU-C5  
ST356-GE-C1  
76 ST204-JA-NV  
ST331-JA-NV  
ST347-SL-NV  
ST336-SL-NV  
98 ST346-SL-NV  
ST369-GE-NV  
ST345-SL-NV  
ST339-SL-NV  
70 ST340-SL-NV  
ST341-SL-NV  
ST342-SL-NV  
ST343-SL-NV  
ST344-SL-NV  
67 ST337-SL-NV  
ST338-SL-NV  
99 ST200-SL-NV  
ST311-UK-NV  
ST368-GE-NV  
ST359-CR-NV  
ST361-CR-NV  
ST177-UK-NV  
ST178-UK-NV  
ST179-UK-NV  
89 ST180-UK-NV  
ST181-UK-NV  
ST202-JA-NV  
66 ST206-US-NV  
ST279-CN-NV  
ST290-CN-NV  
ST297-JA-NV  
ST303-JA-NV  
ST314-UK-NV  
ST335-SL-NV  
ST360-CR-NV  
Cp



*drx*

ST98-UK-C1  
ST370-CA-C1  
ST92-UK-C1  
ST84-US-C1  
ST8-UK/US-C1  
ST79-US-C1  
ST73-UK-C1  
ST380-UK-C1  
ST68-UK-C1  
ST66-UK-C1  
ST53-UK-C1  
ST52-UK-C1  
ST51-UK-C1  
ST49-UK-C1  
ST48-UK-C1  
ST44-UK-C1  
ST42-UK/US-C1  
ST4-UK-C1  
ST36-UK-C1  
ST355-GE-C1  
ST354-GE-C1  
ST334-CN-C1  
ST33-UK-C1  
ST328-UK-C1  
ST326-JA-C1  
ST325-UK-C1  
ST324-UK-C1  
ST323-UK-C1  
ST322-UK-C1  
ST321-CN-C1  
ST319-CN-C1  
ST313-UK-C1  
ST309-UK-C1  
ST306-UK-C1  
ST305-UK-C1  
ST3-UK/US-C1  
ST295-UK-C1  
ST293-CN-C1  
ST288-CN-C1  
ST287-CN-C1  
ST286-CN-C1  
ST284-UK-NV  
ST281-UK-NV  
ST28-UK/US-C1  
ST274-CN-NV  
ST271-UK-C1  
ST267-UK-C1  
ST265-UK-C1  
ST263-UK-C1  
ST250-UK-C1  
ST249-UK-C1  
ST248-UK-C1  
ST247-UK-C1  
ST246-UK-C1  
ST244-UK-C1  
ST242-UK-C1  
ST237-UK-C1  
ST233-UK-C1  
ST214-CN-C1  
ST210-CN-NV  
ST21-UK-C1  
ST203-JA-C1  
ST2-UK/US-C1  
ST199-SL-C1  
ST198-UK-C4  
ST18-UK-C1  
ST17-UK-C1  
ST165-UK-C1  
ST160-UK-C1  
ST16-UK-C1  
ST149-UK-C1  
ST146-UK-C1  
ST144-UK-C1  
ST14-UK-C1  
ST139-UK-C1  
ST138-UK-C1  
ST137-UK-C1  
ST135-UK-C1  
ST134-UK-C1  
ST119-CN-C1  
ST118-CN-C1  
ST115-NE-C1  
ST111-UK-C1  
ST110-US-C1  
ST106-DE-C1  
ST103-DE-C1  
ST102-DE-C1  
ST101-US-C1  
ST10-UK/US-C1  
ST333-CN-C1  
ST195-SL-C5  
ST19-UK-C1  
ST208-CN-C1  
ST211-CN-NV  
ST218-CN-C1  
ST24-UK-C1  
ST35-UK-C1  
ST367-US-C1  
ST60-UK-C1  
ST183-JA-C1  
ST352-CN-C1  
ST378-IT-C1  
ST379-IT-C1  
ST190-US-C1  
ST104-DE-C1  
ST152-UK-C1  
ST153-UK-C1  
ST171-UK-C1  
ST205-JA-C1  
ST312-UK-C1  
ST74-UK-C1  
ST75-UK-C1  
ST80-US-C1  
ST373-CN-C2  
ST302-JA-C1  
ST90-UK-C1  
ST282-UK-NV  
ST185-JA-C1  
ST182-JA-C1  
ST155-UK-C1  
ST308-UK-C1  
ST329-UK-C1  
ST304-JA-NV  
ST113-UK-C1  
ST184-JA-C1  
ST100-US-C1  
ST107-UK-C1  
ST108-US-C1  
ST12-UK-C1  
ST125-UK-C1  
ST126-NE-C1  
ST129-CN-C1  
ST13-UK-C1  
ST131-UK-C1  
ST132-UK-C1  
ST136-UK-C1  
ST143-UK-C1  
ST145-UK-C1  
ST15-UK/US-C1  
ST150-UK-C1  
ST151-UK-C1  
ST189-US-C1  
ST191-US-C1  
ST213-CN-C1  
ST225-UK-C1  
ST234-UK-C1  
ST235-UK-C1  
ST236-UK-C1  
ST239-UK-C1  
ST245-UK-C1  
ST251-UK-C1  
ST255-UK-C1  
ST256-UK-C1  
ST257-UK-C1  
ST268-UK-C1  
ST27-UK-C1  
ST272-UK-C1  
ST278-CN-C1  
ST291-CA-C1  
ST292-CN-C1  
ST294-CN-C1  
ST296-JA-C1  
ST299-JA-C1  
ST301-JA-C1  
ST318-CN-C1  
ST349-CN-C1  
ST40-UK-C1  
ST43-UK-C1  
ST45-UK-C1  
ST46-UK-C1  
ST50-UK-C1  
ST55-UK-C1  
ST56-UK-C1  
ST57-UK-C1  
ST59-UK-C1  
ST6-UK/US-C1  
ST64-UK-C1  
ST70-UK-C1  
ST71-UK-C1  
ST72-UK-C1  
ST76-UK-C1  
ST77-UK-C1  
ST78-UK-C1  
ST82-US-C1  
ST83-US-C1  
ST89-UK-C1  
ST9-UK-C1  
ST91-UK-C1  
ST94-UK-C1  
ST99-UK-C1  
ST358-CN-C1  
ST363-US-C1  
ST376-AR-C1  
ST96-UK-C3  
ST377-AR-NV  
ST5-UK-C3  
ST285-CN-C3  
ST25-UK-C3  
ST221-CN-C3  
ST22-UK-C3  
ST209-CN-C3  
ST201-JA-C3  
ST162-UK-C3  
ST122-NE-NV  
ST105-DE-C1  
ST327-UK-C4  
ST332-CN-C4  
ST310-UK-C4  
ST300-JA-C4  
ST30-UK-C4  
ST283-UK-NV  
ST273-UK-C4  
ST260-UK-C4  
ST254-UK-C4  
ST243-UK-C4  
ST23-UK-C4  
ST142-UK-C4  
ST124-UK-C4  
ST172-CN-C1  
ST93-US-C4  
ST375-AR-C4  
ST88-US-C4  
ST87-US-C4  
ST86-US-C4  
ST81-US-C4  
ST37-UK-C4  
ST350-JA-C4  
ST261-UK-C4  
ST219-CN-C4  
ST217-CN-C4  
ST216-CN-C4  
ST215-CN-C4  
ST170-AU-C4  
ST121-NE-C4  
ST316-AU-C5  
ST317-UK-C5  
ST315-AU-C5  
ST280-AU-C5  
ST275-CL-C5  
ST258-UK-C5  
ST207-UK-C5  
ST193-SL-C5  
ST187-UK-C5  
ST186-UK-C5  
ST174-AU-C5  
ST173-AU-C5  
ST169-AU-C5  
ST167-AU-C5  
ST166-AU-C5  
ST164-AU-C5  
ST163-AU-C5  
ST161-UK-C5  
ST148-UK-C5  
ST147-UK-C5  
ST11-UK-C5  
ST168-AU-C5  
ST109-US-C4  
ST127-NE-C4  
ST158-UK-C4  
ST159-UK-C4  
ST238-UK-C4  
ST241-UK-C4  
ST259-UK-C4  
ST262-UK-C4  
ST266-UK-C4  
ST298-JA-C4  
ST320-CN-C4  
ST330-JA-C1  
ST38-UK-C4  
ST39-UK-C4  
ST364-US-C2  
ST371-CN-C2  
ST62-UK-C2  
ST353-GE-C2  
ST227-UK-C2  
ST222-UK-C2  
ST197-SL-C2  
ST120-NE-C2  
ST1-UK-C2  
ST366-US-C2  
ST97-UK-C2  
ST372-CN-C2  
ST95-UK-C2  
ST61-UK-C2  
ST47-UK-C2  
ST351-JA-C2  
ST32-UK-C2  
ST269-UK-C2  
ST228-UK-C2  
ST223-UK-C2  
ST194-SL-C2  
ST192-SL-C2  
ST130-SP-C2  
ST253-UK-C2  
ST114-UK-C2  
ST116-NE-C2  
ST123-NE-C2  
ST128-NE-C1  
ST140-UK-C2  
ST154-UK-C2  
ST156-UK-C2  
ST157-UK-C2  
ST176-US-C2  
ST188-US-C2  
ST196-SL-C2  
ST224-UK-C2  
ST226-UK-C2  
ST229-UK-C2  
ST230-UK-C2  
ST231-UK-C2  
ST232-UK-C2  
ST252-UK-C2  
ST264-UK-C2  
ST276-CL-C2  
ST277-CL-C2  
ST41-UK-C2  
ST67-UK-C2  
ST362-CN-C2  
ST365-US-C2  
ST175-AU-C2  
ST112-UK-C1  
ST117-CN-C1  
ST133-UK-C1  
ST141-UK-C1  
ST212-CN-C1  
ST220-CN-C3  
ST240-UK-C1  
ST270-UK-C1  
ST289-CN-C1  
ST31-UK/US-C1  
ST34-UK-C1  
ST348-CN-C1  
ST356-GE-C1  
ST54-UK-C1  
ST58-UK-C1  
ST63-UK/US-C1  
ST65-UK-C1  
ST69-UK-C1  
ST7-UK-C1  
ST85-US-C1  
ST357-CN-C1  
ST374-CN-C1  
ST307-UK-C1  
ST200-SL-NV  
ST311-UK-NV  
ST337-SL-NV  
ST338-SL-NV  
ST368-GE-NV  
ST344-SL-NV  
ST345-SL-NV  
ST342-SL-NV  
ST341-SL-NV  
ST346-SL-NV  
ST369-GE-NV  
ST336-SL-NV  
ST339-SL-NV  
ST340-SL-NV  
ST343-SL-NV  
ST347-SL-NV  
ST204-JA-NV  
ST331-JA-NV  
ST359-CR-NV  
ST361-CR-NV  
ST179-UK-NV  
ST177-UK-NV  
ST18-UK-NV  
ST180-UK-NV  
ST181-UK-NV  
ST202-JA-NV  
ST206-US-NV  
ST279-CN-NV  
ST290-CN-NV  
ST297-JA-NV  
ST303-JA-NV  
ST314-UK-NV  
ST335-SL-NV  
ST360-CR-NV

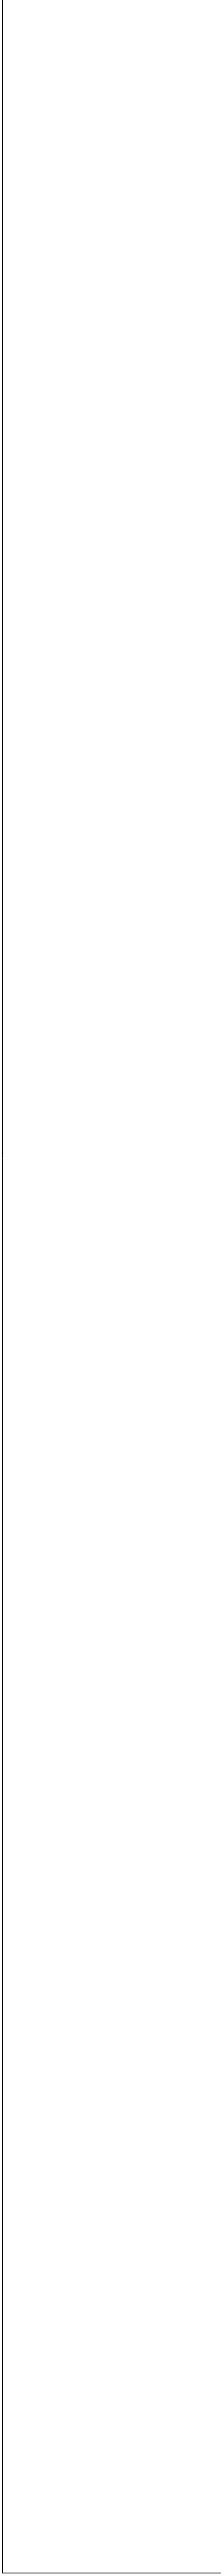

0.10

*glyA*

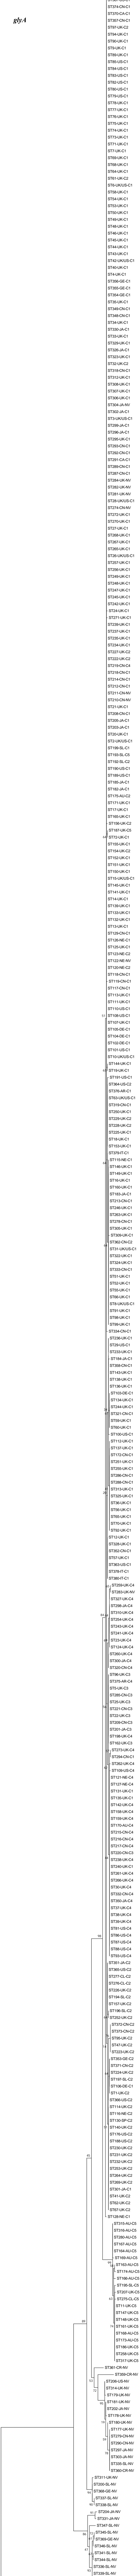

0.050

- ST63-UK/US-C1
- ST64-UK-C1
- ST62-UK-C2
- ST61-UK-C2
- ST60-UK-C1
- ST6-UK/US-C1
- ST59-UK-C1
- ST58-UK-C1
- ST56-UK-C1
- ST55-UK-C1
- ST54-UK-C1
- ST53-UK-C1
- ST52-UK-C1
- ST51-UK-C1
- ST48-UK-C1
- ST47-UK-C2
- ST46-UK-C1
- ST45-UK-C1
- ST44-UK-C1
- ST43-UK-C1
- ST42-UK/US-C1
- ST41-UK-C2
- ST4-UK-C1
- ST36-UK-C1
- ST356-GE-C1
- ST354-GE-C1
- ST353-GE-C2
- ST352-CN-C1
- ST351-JA-C2
- ST35-UK-C1
- ST349-CN-C1
- ST34-UK-C1
- ST333-CN-C1
- ST326-JA-C1
- ST325-UK-C1
- ST324-UK-C1
- ST323-UK-C1
- ST322-UK-C1
- ST319-CN-C1
- ST312-UK-C1
- ST31-UK/US-C1
- ST309-UK-C1
- ST308-UK-C1
- ST307-UK-C1
- ST306-UK-C1
- ST305-UK-C1
- ST302-JA-C1
- ST301-JA-C1
- ST3-UK/US-C1
- ST294-CN-C1
- ST292-CN-C1
- ST291-CA-C1
- ST29-US-C1
- ST288-CN-C1
- ST287-CN-C1
- ST286-CN-C1
- ST281-UK-NV
- ST28-UK/US-C1
- ST278-CN-C1
- ST277-CL-C2
- ST276-CL-C2
- ST275-CL-C5
- ST274-CN-NV
- ST271-UK-C1
- ST270-UK-C1
- ST27-UK-C1
- ST269-UK-C2
- ST268-UK-C1
- ST267-UK-C1
- ST264-UK-C2
- ST263-UK-C1
- ST257-UK-C1
- ST253-UK-C2
- ST252-UK-C2
- ST251-UK-C1
- ST248-UK-C1
- ST247-UK-C1
- ST246-UK-C1
- ST244-UK-C1
- ST242-UK-C1
- ST24-UK-C1
- ST239-UK-C1
- ST237-UK-C1
- ST236-UK-C1
- ST235-UK-C1
- ST234-UK-C1
- ST233-UK-C1
- ST232-UK-C2
- ST229-UK-C2
- ST228-UK-C2
- ST227-UK-C2
- ST225-UK-C1
- ST224-UK-C2
- ST223-UK-C2
- ST222-UK-C2
- ST220-CN-C3
- ST218-CN-C1
- ST213-CN-C1
- ST212-CN-C1
- ST211-CN-NV
- ST210-CN-NV
- ST21-UK-C1
- ST208-CN-C1
- ST20-UK-C1
- ST203-JA-C1
- ST245-UK-C1
- ST199-SL-C1
- ST197-SL-C2
- ST194-SL-C2
- ST192-SL-C2
- ST191-US-C1
- ST19-UK-C1
- ST189-US-C1
- ST184-JA-C1
- ST183-JA-C1
- ST18-UK-C1
- ST176-US-C2
- ST175-AU-C2
- ST172-CN-C1
- ST17-UK-C1
- ST165-UK-C1
- ST160-UK-C1
- ST16-UK-C1
- ST157-UK-C2
- ST154-UK-C2
- ST152-UK-C1
- ST151-UK-C1
- ST149-UK-C1
- ST146-UK-C1
- ST145-UK-C1
- ST144-UK-C1
- ST143-UK-C1
- ST140-UK-C2
- ST139-UK-C1
- ST138-UK-C1
- ST137-UK-C1
- ST136-UK-C1
- ST135-UK-C1
- ST134-UK-C1
- ST133-UK-C1
- ST131-UK-C1
- ST130-SP-C2
- ST129-CN-C1
- ST128-NE-C1
- ST126-NE-C1
- ST123-NE-C2
- ST122-NE-NV
- ST119-CN-C1
- ST118-CN-C1
- ST116-NE-C2
- ST115-NE-C1
- ST114-UK-C2
- ST113-UK-C1
- ST112-UK-C1
- ST111-UK-C1
- ST106-DE-C1
- ST105-DE-C1
- ST104-DE-C1
- ST101-US-C1
- ST1-UK-C2
- ST10-UK/US-C1
- ST65-UK-C1
- ST66-UK-C1
- ST67-UK-C2
- ST69-UK-C1
- ST7-UK-C1
- ST70-UK-C1
- ST71-UK-C1
- ST72-UK-C1
- ST73-UK-C1
- ST76-UK-C1
- ST78-UK-C1
- ST79-US-C1
- ST8-UK/US-C1
- ST82-US-C1
- ST83-US-C1
- ST84-US-C1
- ST85-US-C1
- ST89-UK-C1
- ST9-UK-C1
- ST90-UK-C1
- ST91-UK-C1
- ST92-UK-C1
- ST94-UK-C1
- ST95-UK-C2
- ST97-UK-C2
- ST98-UK-C1
- ST99-UK-C1
- ST357-CN-C1
- ST358-CN-C1
- ST362-CN-C2
- ST363-US-C1
- ST364-US-C2
- ST366-US-C2
- ST371-CN-C2
- ST372-CN-C2
- ST373-CN-C2
- ST374-CN-C1
- ST378-IT-C1
- ST380-IT-C1
- ST367-US-C1
- ST156-UK-C2
- ST188-US-C2
- ST196-SL-C2
- ST226-UK-C2
- ST230-UK-C2
- ST231-UK-C2
- ST365-US-C2
- ST293-CN-C1
- ST313-UK-C1
- ST328-UK-C1
- ST315-AU-C5
- ST316-AU-C5
- ST280-AU-C5
- ST186-UK-C5
- ST174-AU-C5
- ST173-AU-C5
- ST169-AU-C5
- ST168-AU-C5
- ST167-AU-C5
- ST166-AU-C5
- ST164-AU-C5
- ST163-AU-C5
- ST11-UK-C5
- ST147-UK-C5
- ST148-UK-C5
- ST161-UK-C5
- ST187-UK-C5
- ST193-SL-C5
- ST195-SL-C5
- ST207-UK-C5
- ST258-UK-C5
- ST317-UK-C5
- ST96-UK-C3
- ST25-UK-C3
- ST5-UK-C3
- ST240-UK-C1
- ST221-CN-C3
- ST22-UK-C3
- ST209-CN-C3
- ST201-JA-C3
- ST162-UK-C3
- ST117-CN-C1
- ST100-US-C1
- ST285-CN-C3
- ST261-UK-C4
- ST39-UK-C4
- ST158-UK-C4
- ST121-NE-C4
- ST350-JA-C4
- ST23-UK-C4
- ST93-US-C4
- ST109-US-C4
- ST124-UK-C4
- ST127-NE-C4
- ST142-UK-C4
- ST159-UK-C4
- ST170-AU-C4
- ST198-UK-C4
- ST215-CN-C4
- ST216-CN-C4
- ST217-CN-C4
- ST219-CN-C4
- ST238-UK-C4
- ST241-UK-C4
- ST243-UK-C4
- ST254-UK-C4
- ST259-UK-C4
- ST260-UK-C4
- ST262-UK-C4
- ST266-UK-C4
- ST273-UK-C4
- ST283-UK-NV
- ST298-JA-C4
- ST30-UK-C4
- ST300-JA-C4
- ST310-UK-C4
- ST320-CN-C4
- ST327-UK-C4
- ST33-UK-C1
- ST332-CN-C4
- ST348-CN-C1
- ST37-UK-C4
- ST38-UK-C4
- ST81-US-C4
- ST86-US-C4
- ST87-US-C4
- ST88-US-C4
- ST375-AR-C4
- ST379-IT-C1
- ST75-UK-C1
- ST80-US-C1
- ST377-AR-NV
- ST77-UK-C1
- ST74-UK-C1
- ST57-UK-C1
- ST40-UK-C1
- ST284-UK-NV
- ST250-UK-C1
- ST171-UK-C1
- ST150-UK-C1
- ST141-UK-C1
- ST12-UK-C1
- ST107-UK-C1
- ST272-UK-C1
- ST103-DE-C1
- ST108-US-C1
- ST15-UK/US-C1
- ST255-UK-C1
- ST296-JA-C1
- ST321-CN-C1
- ST320-JA-C1
- ST376-AR-C1
- ST329-UK-C1
- ST318-CN-C1
- ST299-JA-C1
- ST26-UK/US-C1
- ST190-US-C1
- ST125-UK-C1
- ST110-US-C1
- ST102-DE-C1
- ST120-NE-C2
- ST13-UK-C1
- ST132-UK-C1
- ST14-UK-C1
- ST155-UK-C1
- ST182-JA-C1
- ST185-JA-C1
- ST2-UK/US-C1
- ST205-JA-C1
- ST214-CN-C1
- ST249-UK-C1
- ST256-UK-C1
- ST265-UK-C1
- ST282-UK-NV
- ST289-CN-C1
- ST295-UK-C1
- ST304-JA-NV
- ST334-CN-C1
- ST355-GE-C1
- ST49-UK-C1
- ST50-UK-C1
- ST68-UK-C1
- ST370-CA-C1
- ST338-SL-NV
- ST368-GE-NV
- ST200-SL-NV
- ST359-CR-NV
- ST361-CR-NV
- ST178-UK-NV
- ST179-UK-NV
- ST180-UK-NV
- ST290-CN-NV
- ST314-UK-NV
- ST177-UK-NV
- ST181-UK-NV
- ST202-JA-NV
- ST206-US-NV
- ST279-CN-NV
- ST297-JA-NV
- ST303-JA-NV
- ST335-SL-NV
- ST360-CR-NV
- ST204-JA-NV
- ST331-JA-NV
- ST347-SL-NV
- ST336-SL-NV
- ST339-SL-NV
- ST340-SL-NV
- ST341-SL-NV
- ST342-SL-NV
- ST343-SL-NV
- ST344-SL-NV
- ST345-SL-NV
- ST346-SL-NV
- ST369-GE-NV
- Cp

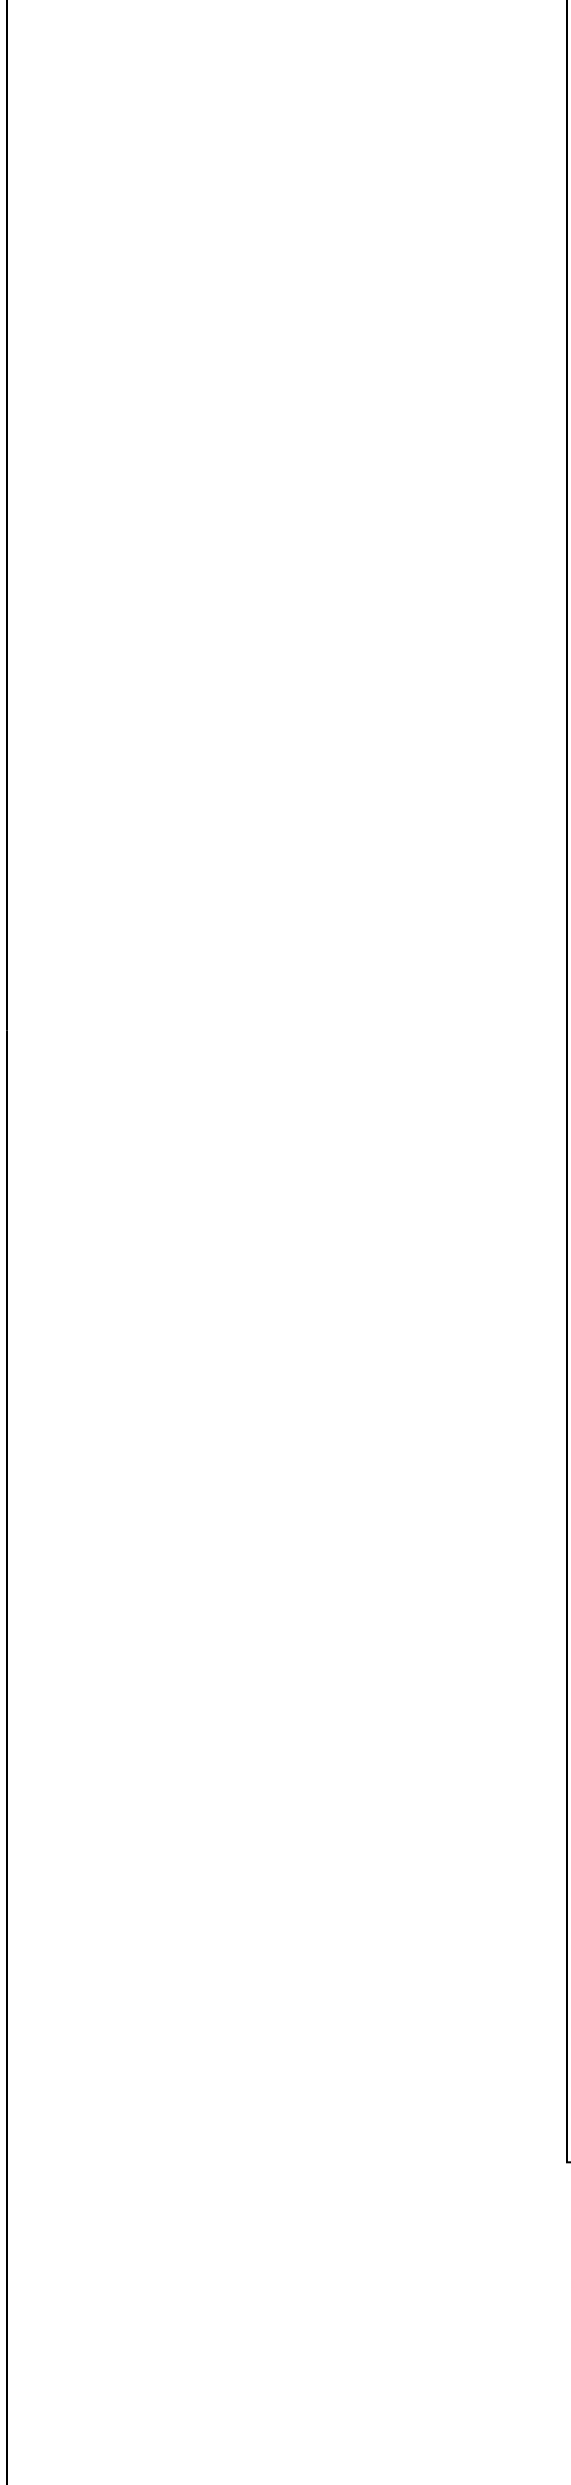



sodA

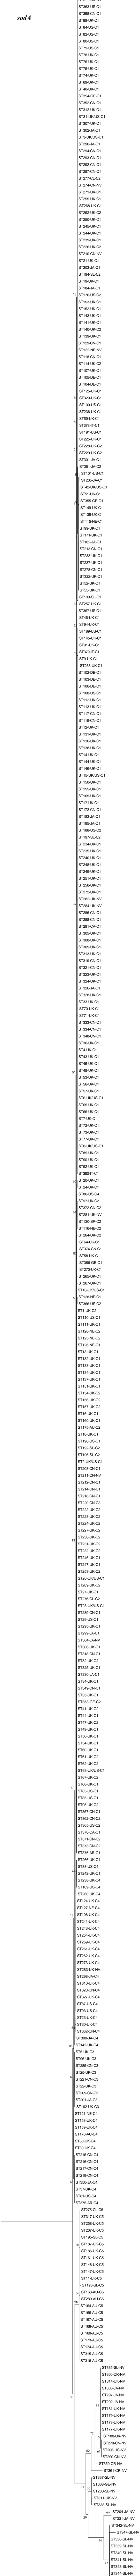

— Cp

0.050

- ST374-CN-C1
- ST378-IT-C1
- ST373-CN-C2
- ST370-CA-C1
- ST364-US-C2
- ST363-US-C1
- ST358-CN-C1
- ST357-CN-C1
- ST97-UK-C2
- ST95-UK-C2
- ST94-UK-C1
- ST92-UK-C1
- ST91-UK-C1
- ST90-UK-C1
- ST89-UK-C1
- ST84-US-C1
- ST83-US-C1
- ST8-UK-US-C1
- ST78-UK-C1
- ST77-UK-C1
- ST76-UK-C1
- ST75-UK-C1
- ST73-UK-C1
- ST72-UK-C1
- ST71-UK-C1
- ST70-UK-C1
- ST7-UK-C1
- ST69-UK-C1
- ST68-UK-C1
- ST62-UK-C2
- ST60-UK-C1
- ST6-UK-US-C1
- ST59-UK-C1
- ST58-UK-C1
- ST56-UK-C1
- ST53-UK-C1
- ST52-UK-C1
- ST48-UK-C1
- ST46-UK-C1
- ST45-UK-C1
- ST44-UK-C1
- ST42-UK-US-C1
- ST40-UK-C1
- ST36-UK-C1
- ST356-GE-C1
- ST355-GE-C1
- ST353-GE-C2
- ST352-CN-C1
- ST351-JA-C2
- ST348-CN-C1
- ST34-UK-C1
- ST334-CN-C1
- ST333-CN-C1
- ST329-UK-C1
- ST325-UK-C1
- ST324-UK-C1
- ST323-UK-C1
- ST319-CN-C1
- ST31-UK-US-C1
- ST309-UK-C1
- ST307-UK-C1
- ST305-UK-C1
- ST304-JA-NV
- ST302-JA-C1
- ST3-UK-US-C1
- ST296-JA-C1
- ST295-UK-C1
- ST293-CN-C1
- ST29-US-C1
- ST289-CN-C1
- ST282-UK-NV
- ST28-UK-US-C1
- ST272-UK-C1
- ST271-UK-C1
- ST268-UK-C1
- ST265-UK-C1
- ST257-UK-C1
- ST256-UK-C1
- ST255-UK-C1
- ST251-UK-C1
- ST250-UK-C1
- ST246-UK-C1
- ST245-UK-C1
- ST244-UK-C1
- ST242-UK-C1
- ST240-UK-C1
- ST237-UK-C1
- ST234-UK-C1
- ST233-UK-C1
- ST230-UK-C2
- ST228-UK-C2
- ST227-UK-C2
- ST218-CN-C1
- ST217-CN-C4
- ST205-JA-C1
- ST203-JA-C1
- ST2-UK-US-C1
- ST194-SL-C2
- ST192-SL-C2
- ST191-US-C1
- ST190-US-C1
- ST189-US-C1
- ST185-JA-C1
- ST184-JA-C1
- ST183-JA-C1
- ST182-JA-C1
- ST171-UK-C1
- ST165-UK-C1
- ST160-UK-C1
- ST16-UK-C1
- ST155-UK-C1
- ST153-UK-C1
- ST150-UK-C1
- ST149-UK-C1
- ST143-UK-C1
- ST138-UK-C1
- ST137-UK-C1
- ST135-UK-C1
- ST132-UK-C1
- ST131-UK-C1
- ST125-UK-C1
- ST120-NE-C2
- ST12-UK-C1
- ST119-CN-C1
- ST117-CN-C1
- ST113-UK-C1
- ST110-US-C1
- ST10-UK-US-C1
- ST100-US-C1
- ST101-US-C1
- ST102-DE-C1
- ST106-DE-C1
- ST107-UK-C1
- ST270-UK-C1
- ST306-UK-C1
- ST312-UK-C1
- ST136-UK-C1
- ST57-UK-C1
- ST1-UK-C2
- ST108-US-C1
- ST116-NE-C2
- ST197-SL-C2
- ST223-UK-C2
- ST225-UK-C1
- ST232-UK-C2
- ST269-UK-C2
- ST67-UK-C2
- ST366-US-C2
- ST371-CN-C2
- ST249-UK-C1
- ST79-US-C1
- ST104-DE-C1
- ST141-UK-C1
- ST199-SL-C1
- ST208-CN-C1
- ST212-CN-C1
- ST213-CN-C1
- ST216-CN-C4
- ST235-UK-C1
- ST236-UK-C1
- ST239-UK-C1
- ST247-UK-C1
- ST288-CN-C1
- ST291-CA-C1
- ST292-CN-C1
- ST294-CN-C1
- ST318-CN-C1
- ST321-CN-C1
- ST349-CN-C1
- ST35-UK-C1
- ST43-UK-C1
- ST51-UK-C1
- ST65-UK-C1
- ST367-US-C1
- ST267-UK-C1
- ST145-UK-C1
- ST214-CN-C1
- ST248-UK-C1
- ST278-CN-C1
- ST55-UK-C1
- ST99-UK-C1
- ST372-CN-C2
- ST380-IT-C1
- ST365-US-C2
- ST362-CN-C2
- ST61-UK-C2
- ST47-UK-C2
- ST41-UK-C2
- ST28-UK-C2
- ST281-UK-NV
- ST264-UK-C2
- ST253-UK-C2
- ST252-UK-C2
- ST231-UK-C2
- ST229-UK-C2
- ST226-UK-C2
- ST224-UK-C2
- ST222-UK-C2
- ST196-SL-C2
- ST188-US-C2
- ST175-AU-C2
- ST157-UK-C2
- ST156-UK-C2
- ST154-UK-C2
- ST140-UK-C2
- ST130-SP-C2
- ST128-NE-C1
- ST123-NE-C2
- ST311-UK-NV
- ST200-SL-NV
- ST368-GE-NV
- ST337-SL-NV
- ST338-SL-NV
- ST50-UK-C1
- ST85-US-C1
- ST98-UK-C1
- ST82-US-C1
- ST80-US-C1
- ST66-UK-C1
- ST63-UK-US-C1
- ST54-UK-C1
- ST49-UK-C1
- ST4-UK-C1
- ST354-GE-C1
- ST33-UK-C1
- ST322-UK-C1
- ST286-CN-C1
- ST263-UK-C1
- ST24-UK-C1
- ST220-CN-C3
- ST21-UK-C1
- ST20-UK-C1
- ST193-SL-C5
- ST19-UK-C1
- ST172-CN-C1
- ST17-UK-C1
- ST152-UK-C1
- ST151-UK-C1
- ST144-UK-C1
- ST14-UK-C1
- ST139-UK-C1
- ST134-UK-C1
- ST133-UK-C1
- ST129-CN-C1
- ST126-NE-C1
- ST115-NE-C1
- ST112-UK-C1
- ST111-UK-C1
- ST105-DE-C1
- ST103-DE-C1
- ST308-UK-C1
- ST313-UK-C1
- ST328-UK-C1
- ST74-UK-C1
- ST114-UK-C2
- ST176-US-C2
- ST277-CL-C2
- ST276-CL-C2
- ST315-AU-C5
- ST317-AU-C5
- ST280-AU-C5
- ST275-CL-C5
- ST207-UK-C5
- ST195-SL-C5
- ST187-UK-C5
- ST186-UK-C5
- ST169-AU-C5
- ST166-AU-C5
- ST147-UK-C5
- ST11-UK-C5
- ST258-UK-C5
- ST173-AU-C5
- ST161-UK-C5
- ST167-AU-C5
- ST168-AU-C5
- ST174-AU-C5
- ST316-AU-C5
- ST148-UK-C5
- ST164-AU-C5
- ST201-JA-C3
- ST215-CN-C4
- ST221-CN-C3
- ST162-UK-C3
- ST22-UK-C3
- ST25-UK-C3
- ST285-CN-C3
- ST5-UK-C3
- ST96-UK-C3
- ST320-CN-C4
- ST332-CN-C4
- ST300-JA-C4
- ST30-UK-C4
- ST283-UK-NV
- ST274-CN-NV
- ST266-UK-C4
- ST260-UK-C4
- ST259-UK-C4
- ST254-UK-C4
- ST241-UK-C4
- ST238-UK-C4
- ST23-UK-C4
- ST170-AU-C4
- ST158-UK-C4
- ST142-UK-C4
- ST127-NE-C4
- ST109-US-C4
- ST327-UK-C4
- ST261-UK-C4
- ST273-UK-C4
- ST38-UK-C4
- ST124-UK-C4
- ST86-US-C4
- ST375-AR-C4
- ST81-US-C4
- ST37-UK-C4
- ST350-JA-C4
- ST287-CN-C1
- ST219-CN-C4
- ST211-CN-NV
- ST210-CN-NV
- ST209-CN-C3
- ST121-NE-C4
- ST122-NE-NV
- ST159-UK-C4
- ST198-UK-C4
- ST243-UK-C4
- ST262-UK-C4
- ST284-UK-NV
- ST298-UK-C4
- ST310-UK-C4
- ST39-UK-C4
- ST87-US-C4
- ST88-US-C4
- ST93-US-C4
- ST377-AR-NV
- ST146-UK-C1
- ST26-UK-US-C1
- ST27-UK-C1
- ST299-JA-C1
- ST326-JA-C1
- ST330-JA-C1
- ST376-AR-C1
- ST379-IT-C1
- ST118-CN-C1
- ST301-JA-C1
- ST361-CR-NV
- ST359-CR-NV
- ST314-UK-NV
- ST360-CR-NV
- ST297-JA-NV
- ST181-UK-NV
- ST178-UK-NV
- ST179-UK-NV
- ST290-CN-NV
- ST335-SL-NV
- ST177-UK-NV
- ST180-UK-NV
- ST202-JA-NV
- ST206-US-NV
- ST279-CN-NV
- ST303-JA-NV
- ST204-JA-NV
- ST331-JA-NV
- ST347-SL-NV
- ST340-SL-NV
- ST369-GE-NV
- ST345-SL-NV
- ST346-SL-NV
- ST336-SL-NV
- ST342-SL-NV
- ST339-SL-NV
- ST341-SL-NV
- ST343-SL-NV
- ST344-SL-NV

Cp
